1 Short-stay admissions and lower staffing associated with larger COVID-19 outbreaks in  
2 Maryland nursing homes

3

4 T. Joseph Mattingly II, PharmD, MBA, PhD,<sup>a</sup> Alison Trinkoff, RN, MPH, ScD,<sup>b</sup> Alison D  
5 Lydecker, MPH,<sup>c</sup> Justin J. Kim, MD,<sup>c</sup> Jung Min Yoon, MSN, RN,<sup>d</sup> Mary-Claire Roghmann,  
6 MD, MS<sup>c,e</sup>

7

8 <sup>a</sup>University of Maryland School of Pharmacy, Baltimore, Maryland 21201, USA

9 <sup>b</sup>Department of Family and Community Health, University of Maryland School of Nursing,  
10 Baltimore, Maryland 21201, USA

11 <sup>c</sup>Department of Epidemiology and Public Health, University of Maryland School of Medicine,  
12 Baltimore, Maryland 21201, USA

13 <sup>d</sup>University of Maryland School of Nursing, Baltimore, Maryland 21201, USA

14 <sup>e</sup>Geriatrics Research Education and Clinical Center, VA Maryland Health Care System,  
15 Baltimore, Maryland 21201, USA

16

17 Corresponding author:

18 Mary-Claire Roghmann, MD, MS

19 University of Maryland School of Medicine

20 10 South Pine Street, MTSF Room 336

21 Baltimore, MD 21201

22 Telephone: 410-706-0062

23 Email: [mroghman@som.umaryland.edu](mailto:mroghman@som.umaryland.edu)

24

25 Running title: Characteristics of COVID-19 outbreaks in MD NHs

26 Key words: COVID-19, nursing homes, outbreaks

27

28 Funding sources: This work was supported by the Centers for Disease Control and Prevention

29 (Epicenter Grant 1U01CK000556-02-02)

30

31 Word count: 1882

32 Reference count: 20

33

34 Brief summary: Maryland nursing homes in counties with a high COVID-19 incidence, more

35 licensed beds, a higher proportion of short-stay residents, or lower CNA staffing hours were

36 more likely to have a larger outbreak early in the pandemic.

37

38 Acknowledgements: The sponsor had no role in the design, methods, analysis, or preparation of

39 the manuscript.

40

41 **Abstract**

42 **Objectives:** Identify facility factors associated with a larger COVID-19 outbreak among  
43 residents in Maryland nursing homes (NHs).

44 **Design:** Observational

45 **Setting and Participants:** All Maryland NHs.

46 **Methods:** Resident COVID-19 cases were collected for each Maryland NH from January 1,  
47 2020 through July 1, 2020. Cumulative COVID-19 incidence through July 1, 2020 was collected  
48 for each county and Baltimore City. Facility characteristics for each Maryland NH were  
49 collected from time periods prior to January 1, 2020. NH outbreaks were defined as larger when  
50 total resident COVID-19 cases exceeded 10% of licensed beds. Descriptive and multivariable  
51 analyses were conducted to assess the strongest predictors for the primary outcome of larger  
52 COVID-19 outbreak.

53 **Results:** NHs located in counties with high cumulative incidence of COVID-19 were more likely  
54 to have larger outbreaks (OR 4.5, 95% CI 2.3-8.7,  $p < 0.01$ ). NHs with at least 100 beds were  
55 more likely to have larger outbreaks, especially among facilities with >140 licensed beds (100-  
56 140 beds vs <100 beds: OR 1.9, 95% CI 0.9-4.1,  $p = 0.09$ ; >140 beds vs <100 beds: OR 2.9, 95%  
57 CI 1.3-6.1,  $p < 0.01$ ). NHs with more short-stay residents (OR 2.2, 95% CI 1.1-4.8,  $p = 0.04$ ) or  
58 fewer Certified Nursing Assistant hours daily (OR 2.6, 95% CI 1.3-5.3,  $p < 0.01$ ) also were more  
59 likely to have larger outbreaks. Resident race and gender were not significant predictors of larger  
60 outbreaks after adjustment for other factors.

61 **Conclusions:** Large NHs with lower staffing levels and many short-stay residents in counties  
62 with high COVID-19 incidence were at increased risk for COVID-19 outbreaks. Understanding

63 the characteristics of nursing homes associated with larger outbreaks can help us prepare for the  
64 next pandemic.

65

## 66 **Introduction**

67 Nursing home residents represent a disproportionately high percentage of deaths from  
68 coronavirus disease 2019 (COVID-19) for two major reasons. First, they are at high risk for  
69 acquiring this infection because of the congregate setting, with proximity to other residents and  
70 the staff who care for them. Second, most residents are older adults with multiple comorbidities  
71 such as heart disease and diabetes, all associated with higher risks of hospitalization and death  
72 from COVID-19.

73

74 COVID-19 outbreaks typically occur in nursing homes (NHs) after introduction of the virus from  
75 asymptomatic and infectious NH staff, with subsequent spread to other staff, to residents and  
76 from resident-to-resident. Infection prevention has focused on a bundled approach for reducing  
77 introduction and spread through: visitor restrictions, pre-admission testing and quarantine for  
78 residents, routine staff testing, symptomatic resident testing, universal medical masks with eye  
79 protection for staff, and cloth face masks for residents when outside of their rooms.<sup>1</sup> Vaccination  
80 of staff and residents will reduce risks even further.<sup>2</sup>

81

82 Despite their vulnerabilities, some NHs have had larger outbreaks than others. Studies to date  
83 have shown that various organizational and facility factors such as facility size and occupancy,  
84 ratings and quality metrics, staffing, and resident ethnicity are related to the presence of COVID-

85 19 in NHs.<sup>3-12</sup> The purpose of this study was to assess NH factors that determine the trajectory  
86 of COVID-19 outbreaks.

87  
88 We seek to add to the existing literature by focusing on the state of Maryland during its initial  
89 wave of infections in the first half of 2020. During this time, the state imposed health directives  
90 to restrict visitation, implement infection prevention protocols, expedite testing of symptomatic  
91 residents, quarantine new admissions and test all residents and staff in all Maryland nursing  
92 homes. Our analysis is unique in that we compare a set of nursing homes under the same health  
93 directives by outbreak size and have unique facility data on family satisfaction with nursing  
94 home care. This allows us to assess factors associated with outbreak size while controlling for  
95 introduction from the local community.

96

## 97 **Methods**

98 Design overview: This is a secondary data analysis relating facility factors to size of COVID-19  
99 outbreak in Maryland NHs. To evaluate management of the COVID-19 outbreaks, NHs were  
100 divided into two comparison groups: those with cumulative resident cases totaling up to 10% of  
101 bed capacity, vs those with cumulative resident cases totaling more than 10% of beds from  
102 January 1 to July 1, 2020. This was chosen over a binary outbreak definition (yes/no), given that  
103 introduction of COVID-19 was likely dependent on community incidence, whereas outbreak size  
104 could also reflect facility factors. NHs that contained the outbreak ( $\leq 10\%$  of beds) represented  
105 facilities that prevented or managed the outbreak effectively.

106

107 The sample included all Maryland NHs with Medicare and/or Medicaid Certification that had  
108 complete data for all covariates (n=216). Weekly COVID-19 case counts for NH residents were  
109 obtained from the Maryland Department of Health coronavirus website<sup>13</sup> for weeks ending April  
110 29, 2020 (the first week cumulative data from January forward were reported) through July 1,  
111 2020. County-level cumulative incidence of COVID-19 through July 1, 2020 was calculated by  
112 subtracting the total number of COVID-19 cases in the county NHs from the total number of  
113 COVID-19 cases in the county and then dividing by the total county population. Population and  
114 COVID-19 cases by county were obtained from the Johns Hopkins University Coronavirus  
115 Resource Center.<sup>14</sup> Counties were then divided into tertiles by cumulative incidence per thousand  
116 population (low: 0-4.00 per 1000, moderate: 4.01-7.86, high: >7.86). Each NH was assigned to  
117 the cumulative incidence tertile for its county of location.

118  
119 NH-level resident and facility characteristics were obtained as a flat file for 2019-20 from the  
120 Center for Medicaid and Medicare Services (CMS) CASPER and from the Maryland Health  
121 Care Commission (MHCC). These included facility size: small-<100 beds, medium: 101-140,  
122 large: >140 beds, ownership: for-profit vs. not for profit (government, other), and CMS quality  
123 star ratings, ranging from 1-5. The MHCC defines residents as short stay when facility length of  
124 stay is <100 days. Family satisfaction was examined in relation to outbreak size, comparing NHs  
125 on the question: “family would recommend facility to others” (<80% would recommend, vs.  
126 ≥80% recommend) using the most recent (2017) MHCC family survey data.

127  
128 Staffing data were calculated as hours per resident day (HPRD) using Payroll Based Journal  
129 (PBJ) data from CMS. PBJ data provides daily information on the total working hours of NH

130 staff and the number of residents within a 24-hour period at each NH.<sup>15</sup> HPRD were calculated  
131 by dividing total nursing staff work hours for a 24-hour period by the number of NH residents  
132 for the same period during quarter 4, 2019 (October-December).<sup>16</sup> Then a quarterly average  
133 HPRD was calculated for certified nurse assistants (CNAs): nurse aides and certified medication  
134 aides. CNA HPRD were dichotomized as <75 percentile vs. >=75 percentile.

135  
136 Analysis: Descriptive statistics were reported for all variables, beginning with the unadjusted  
137 association between all independent variables and the primary outcome, outbreak size, using  
138 student t-test for continuous variables and Chi Square or Fisher's Exact test for categorical  
139 variables, as appropriate. In addition, NHs were compared by COVID-19 outbreak size in  
140 relation to the facility factors using multivariable regression techniques. Independent variable  
141 selection used forward forced entry, beginning with county-level cumulative incidence, to  
142 control for the likelihood of introduction into the facility.<sup>17</sup> The Hosmer and Lemeshow  
143 goodness of fit test<sup>18</sup> was used to assess model fit. All analyses were performed with Stata 15.1  
144 (Stata Corp., College Station, TX) and SAS 9.4 (SAS Institute, Inc. Cary, NC).

145

## 146 **Results**

147 Of the 227 NHs in Maryland, 216 (95%) NHs were included in our analysis with 6 NHs  
148 excluded for missing nursing staffing hours, 4 for missing family experience survey data, and 1  
149 for missing data on age and gender of residents. Table 1 shows the baseline characteristics for  
150 residents and facilities as well as the proportion of NHs with total resident COVID-19 cases  
151 >10% of licensed beds.

152

153 Descriptive analyses found associations between several resident and facility characteristics and  
154 a larger COVID-19 outbreak (Table 2). Facilities with a higher proportion of residents that were  
155 male ( $p=0.03$ ), black ( $p=0.0005$ ), and short stay ( $p=0.004$ ) were associated with having a larger  
156 outbreak ( $>10\%$  of licensed beds). Facility size was associated with COVID-19 outbreak size  
157 ( $p=0.0002$ ) with larger NHs ( $>140$  beds) almost twice as likely to have a larger outbreak as small  
158 NHs ( $<100$  beds). Higher CMS quality star ratings were associated ( $p=0.04$ ) with having a larger  
159 outbreak.

160  
161 Table 3 shows the results of six different logistic regression models, beginning with our base  
162 model that included county incidence, facility size, proportion of short-stay residents, and  
163 proportion of families surveyed who would recommend the facility. Across all models, higher  
164 county incidence ( $p<0.0001$ ), larger facilities ( $p=0.007$ ), higher proportion of short stay residents  
165 ( $p=0.035$ ), and CNA HPRD below 75<sup>th</sup> percentile ( $p=0.009$ ) were consistently associated with  
166 having a COVID-19 outbreak  $>10\%$ ; race and gender were not significant after adjustment for  
167 other factors. A high CMS star quality rating remained associated with a larger outbreak though  
168 not significantly so (OR 1.68, 95% CI 0.84-3.35). Family recommendation was somewhat  
169 associated with larger outbreaks, though this was attenuated by CNA HPRD. All six models  
170 passed the Hosmer and Lemeshow goodness of fit test with p-values above 0.6.

171

## 172 **Discussion**

173 In summary, our analysis found that nursing homes 1) in counties with a high COVID-19  
174 cumulative incidence, 2) with more licensed beds, 3) with a higher proportion of short-stay  
175 residents, and 4) lower CNA staffing hours were more likely to have a larger outbreak early in



176 the pandemic. After adjusting for these factors, neither race nor gender were associated with a  
177 larger outbreak. The highest CMS star quality rating remained associated with a larger outbreak.

178  
179 The geographic location of the nursing home had the strongest association with larger outbreaks.  
180 This is not surprising, as staff tend to live in the same county where they work and staff  
181 introduce COVID-19 into the facility; therefore, adjusting for local prevalence is a proxy for the  
182 number of introductions into the nursing home. Community spread is increasingly recognized as  
183 a driver for COVID-19 introductions into nursing homes, as county infection rate, population  
184 density, and the movement of staff between nursing homes have been described as risk factors  
185 for outbreaks.<sup>3,19,20</sup>

186  
187 Larger nursing homes had a higher risk of larger outbreaks (i.e., cumulative resident cases >10%  
188 of licensed beds) perhaps because they employ more staff, thereby increasing the chance of  
189 COVID-19 introduction. This is consistent with existing literature suggesting that larger and  
190 more fully occupied facilities were more likely to have COVID-19 cases<sup>3-6</sup>. We also found that  
191 facilities with a greater proportion of residents who were short-stay had larger outbreaks.  
192 Facilities with more short-stay residents have more admissions and, at least early in the  
193 pandemic, short-stay admissions from hospitals also may have introduced COVID-19 into  
194 nursing homes.

195  
196 Nursing home metrics reflecting poorer quality, including infection control deficiencies and  
197 complaints, have been associated with higher COVID-19 case rates,<sup>3,7,8</sup> while higher star ratings  
198 have been associated with lower rates.<sup>9,10</sup> Surprisingly, higher CMS Quality ratings were

199 associated with larger outbreaks in our study (see Table 2), perhaps because larger facilities  
200 tended to have higher CMS ratings. The highest CMS star quality rating was associated although  
201 not significantly with a larger outbreak in our final models.

202  
203 We did find that facilities with lower family satisfaction scores and fewer CNA staffing hours,  
204 two other measures of quality, had larger outbreaks, consistent with existing work.<sup>4,9,11,12</sup> Higher  
205 staffing ratios may lead to better adherence to state-mandated infection guidelines, thus  
206 preventing spread, for example, allowing for more rapid adoption of infection prevention  
207 practices. Finally, after adjusting for other NH characteristics, gender and race of NH residents  
208 was no longer associated with larger COVID-19 outbreaks. This is in contrast to multiple studies  
209 suggesting an association between race and COVID-19 cases in NHs, supporting the idea that the  
210 NH characteristics (e.g. county location, staffing) are more important than the NHs' resident  
211 demographic characteristics.<sup>3,4,9,10</sup>

212  
213 Our study is unique as our outcome variable measures the ability to prevent spread of COVID-19  
214 and we account for community prevalence by county in a single state with a coordinated  
215 response to COVID-19 in NHs. Most previous studies have used a binary outcome with any  
216 case defined as positive,<sup>3-5,7-9,12</sup> while only a minority have distinguished between small and  
217 large outbreaks.<sup>10,11</sup> We also had a unique measure of quality in the Maryland Health Care  
218 Commission's family satisfaction survey.

219  
220 In conclusion, our results highlight the importance of local epidemiology in the risk of outbreaks  
221 and suggest infection control precautions can be adjusted based on local incidence. Large

222 facilities with a higher proportion of short stay residents are at increased risk for COVID-19  
223 outbreaks despite community infection rates. This highlights the potential importance of  
224 separating long- and short-stay residents and the potential advantages of smaller nursing homes  
225 for infection prevention through fewer staff members and visitors to introduce infections.  
226 Finally, we demonstrate that a high CMS Quality star rating may not be a good measure of a  
227 nursing home’s ability to prevent spread in Maryland unlike another quality measure, staffing  
228 hours per resident, that was associated with outbreak size. Understanding the characteristics of  
229 nursing homes associated with larger outbreaks can help us to better prepare for the next  
230 pandemic.

231

232

233 Conflicts of Interest: None to report.

234

235 Funding sources: This work was supported by the Centers for Disease Control and Prevention  
236 (Epicenter Grant 1U01CK000556-02-02)

237

238

239 **Table 1** – Nursing home characteristics in Maryland as a baseline in December 2019.

|                                                                            | <b>Maryland<br/>(N = 216)</b> | <b>% or SD</b> |
|----------------------------------------------------------------------------|-------------------------------|----------------|
| <b><i>Resident Characteristics at the Facility-level</i></b>               |                               |                |
| <b>Average resident age at facility (Mean/SD)</b>                          | 76.2                          | 7.8            |
| <b>Proportion of male residents (Mean/SD)</b>                              | 40.1                          | 11             |
| <b>Proportion of black residents (Mean/SD)</b>                             | 35.6                          | 28.2           |
| <b>Proportion of residents on Medicaid (Mean/SD)</b>                       | 27.8                          | 17.5           |
| <b>Proportion of short stay residents (Mean/SD)</b>                        | 61.5                          | 18.0           |
| <b>Proportion of dementia patients (Mean/SD)</b>                           | 33.8                          | 13.7           |
| <b>Proportion of patients who are ambulatory (Mean/SD)</b>                 | 30.8                          | 10.7           |
| <b><i>Facility Characteristics</i></b>                                     |                               |                |
| <b>Total licensed beds</b>                                                 |                               |                |
| Small (<100)                                                               | 67                            | 31.0           |
| Medium (100-140)                                                           | 73                            | 33.8           |
| Large (≥140)                                                               | 76                            | 35.2           |
| <b>Ownership</b>                                                           |                               |                |
| Non-profit & government                                                    | 53                            | 24.5           |
| For-profit                                                                 | 163                           | 75.5           |
| <b>Chain</b>                                                               |                               |                |
| Yes                                                                        | 116                           | 53.7           |
| No                                                                         | 100                           | 46.3           |
| <b>Alzheimer’s unit</b>                                                    |                               |                |
| Yes                                                                        | 71                            | 32.9           |
| No                                                                         | 145                           | 67.1           |
| <b>CMS star ratings – quality</b>                                          |                               |                |
| 1-Star                                                                     | 0                             | 0.0            |
| 2-Star                                                                     | 17                            | 7.9            |
| 3-Star                                                                     | 39                            | 18.2           |
| 4-Star                                                                     | 77                            | 36.0           |
| 5-Star                                                                     | 81                            | 37.9           |
| <b>Proportion of families who would recommend facility (Mean/SD)</b>       | 79.5                          | 15.9           |
| <b>Certified nursing assistant hours per resident day (HPRD) (Mean/SD)</b> | 2.1                           | 0.4            |
| <b>Nursing home county-level cumulative incidence of COVID-19</b>          |                               |                |
| Low                                                                        | 28                            | 13.0           |
| Moderate                                                                   | 38                            | 17.6           |
| High                                                                       | 150                           | 69.4           |
| <b><i>Outcome Variable: Outbreak size</i></b>                              |                               |                |
| <b>Total resident COVID-19 cases greater than 10% of licensed beds</b>     |                               |                |
| Yes                                                                        | 127                           | 58.8           |
| No                                                                         | 89                            | 41.2           |

240

241 **Table 2** – Nursing homes with larger outbreaks: total resident COVID-19 cases greater than 10%  
 242 of licensed beds through July 1, 2020 as compared to those without.

|                                                                   | Total resident COVID-19 cases greater than 10% of licensed Beds |         |               |         |                    |
|-------------------------------------------------------------------|-----------------------------------------------------------------|---------|---------------|---------|--------------------|
|                                                                   | No (N = 89)                                                     | % or SD | Yes (N = 127) | % or SD | p-value*           |
| <b>Resident Characteristics at Facility level</b>                 |                                                                 |         |               |         |                    |
| <b>Age in Years (Mean/SD)</b>                                     | 77.4                                                            | 8.1     | 75.4          | 7.5     | 0.07               |
| <b>Proportion of residents with dementia (Mean/SD)</b>            | 35.5                                                            | 13.4    | 32.5          | 13.9    | 0.12               |
| <b>Proportion of residents who are ambulatory (Mean/SD)</b>       | 31.2                                                            | 11.2    | 30.5          | 10.5    | 0.61               |
| <b>Proportion of male residents</b>                               |                                                                 |         |               |         |                    |
| Less than 40%                                                     | 52                                                              | 58.4    | 55            | 44.3    | <b>0.03*</b>       |
| Greater than or equal to 40%                                      | 37                                                              | 41.6    | 72            | 56.7    |                    |
| <b>Proportion of Black residents</b>                              |                                                                 |         |               |         |                    |
| Less than 28%                                                     | 60                                                              | 67.4    | 55            | 43.3    | <b>0.0005*</b>     |
| Greater than or equal to 28%                                      | 29                                                              | 32.6    | 72            | 56.7    |                    |
| <b>Proportion of short-stay residents</b>                         |                                                                 |         |               |         |                    |
| Less than 50%                                                     | 27                                                              | 30.3    | 18            | 14.2    | <b>0.004*</b>      |
| Greater than or equal to 50%                                      | 62                                                              | 69.7    | 109           | 85.8    |                    |
| <b>Facility Characteristics</b>                                   |                                                                 |         |               |         |                    |
| <b>Total licensed beds</b>                                        |                                                                 |         |               |         |                    |
| Small (<100)                                                      | 41                                                              | 46.1    | 26            | 20.5    | <b>0.0002*</b>     |
| Medium (100-140)                                                  | 27                                                              | 30.3    | 46            | 36.2    |                    |
| Large (>140)                                                      | 21                                                              | 23.6    | 55            | 43.3    |                    |
| <b>Ownership</b>                                                  |                                                                 |         |               |         |                    |
| Non-profit & government                                           | 26                                                              | 29.2    | 27            | 21.3    | 0.18               |
| For-profit                                                        | 63                                                              | 70.8    | 100           | 78.7    |                    |
| <b>Chain</b>                                                      |                                                                 |         |               |         |                    |
| Yes                                                               | 41                                                              | 46.1    | 75            | 59.1    | 0.06               |
| No                                                                | 48                                                              | 53.9    | 52            | 40.9    |                    |
| <b>Alzheimer's unit</b>                                           |                                                                 |         |               |         |                    |
| Yes                                                               | 28                                                              | 31.5    | 43            | 33.9    | 0.71               |
| No                                                                | 61                                                              | 68.5    | 84            | 66.1    |                    |
| <b>CMS star ratings – quality</b>                                 |                                                                 |         |               |         |                    |
| 1-Star                                                            | 0                                                               | 0.0     | 0             | 0.0     | <b>0.04*</b>       |
| 2-Star                                                            | 11                                                              | 12.5    | 6             | 4.8     |                    |
| 3-Star                                                            | 16                                                              | 18.2    | 23            | 18.3    |                    |
| 4-Star                                                            | 36                                                              | 40.9    | 41            | 32.5    |                    |
| 5-Star                                                            | 25                                                              | 28.4    | 56            | 44.4    |                    |
| <b>Certified nursing assistants HPRD</b>                          |                                                                 |         |               |         |                    |
| HPRD above 75 <sup>th</sup> percentile                            | 32                                                              | 36.0    | 23            | 18.1    | <b>0.003*</b>      |
| HPRD below 75 <sup>th</sup> percentile                            | 57                                                              | 64.0    | 104           | 81.9    |                    |
| <b>More than 80% of families would recommend NH</b>               |                                                                 |         |               |         |                    |
| Yes                                                               | 58                                                              | 65.2    | 59            | 46.5    | <b>0.007*</b>      |
| No                                                                | 31                                                              | 34.8    | 68            | 53.5    |                    |
| <b>Nursing home county-level cumulative incidence of COVID-19</b> |                                                                 |         |               |         |                    |
| Low                                                               | 22                                                              | 24.7    | 6             | 4.7     | <b>&lt;0.0001*</b> |
| Moderate                                                          | 21                                                              | 23.6    | 17            | 13.4    |                    |
| High                                                              | 46                                                              | 51.7    | 104           | 81.9    |                    |

243

244 **Table 3:** Logistic regression models to predict Maryland nursing homes with cumulative resident COVID-19 cases totaling >10% of  
 245 licensed beds, (n=216 facilities).

| Variable                                                                                                                                                                                          | Model 1     |                  | Model 2     |                  | Model 3     |                  | Model 4     |                  | Model 5     |                  | Model 6     |                  |
|---------------------------------------------------------------------------------------------------------------------------------------------------------------------------------------------------|-------------|------------------|-------------|------------------|-------------|------------------|-------------|------------------|-------------|------------------|-------------|------------------|
|                                                                                                                                                                                                   | OR          | 95% CI           | OR          | 95% CI           | OR          | 95% CI           | OR          | 95% CI           | OR          | 95% CI           | OR          | 95% CI           |
| County-level Incidence (High vs Moderate/Low)                                                                                                                                                     | <b>3.9</b>  | <b>2.04-7.48</b> | <b>4.38</b> | <b>2.24-8.56</b> | 4.47        | 2.30-8.71        | <b>4.42</b> | <b>2.24-8.70</b> | 3.67        | 1.76-7.66        | <b>3.93</b> | <b>1.98-7.79</b> |
| NH size:<br>Medium NH 100-140 bed vs small <100 beds                                                                                                                                              | 2.01        | 0.95-4.26        | 1.84        | 0.86-3.93        | 1.93        | 0.91-4.09        | 1.91        | 0.89-4.08        | 1.8         | 0.84-3.85        | 2.01        | 0.95-4.27        |
| Large NH >140 vs small <100 beds                                                                                                                                                                  | <b>2.85</b> | <b>1.33-6.08</b> | <b>2.72</b> | <b>1.26-5.89</b> | <b>2.86</b> | <b>1.33-6.13</b> | <b>2.82</b> | <b>1.30-6.12</b> | <b>2.63</b> | <b>1.21-5.68</b> | <b>3.08</b> | <b>1.42-6.69</b> |
| Proportion of short-stay residents (50% or greater vs. <50%)                                                                                                                                      | <b>2.4</b>  | <b>1.14-5.04</b> | <b>2.27</b> | <b>1.07-4.84</b> | <b>2.24</b> | <b>1.06-4.75</b> | <b>2.27</b> | <b>1.06-4.86</b> | <b>2.50</b> | <b>1.14-5.45</b> | <b>2.00</b> | <b>0.93-4.32</b> |
| Less than 80% of families would recommend facility                                                                                                                                                | 1.67        | 0.9-3.11         | 1.3         | 0.67-2.54        |             |                  |             |                  |             |                  |             |                  |
| Certified nursing assistants HPRD below 75 <sup>th</sup> percentile                                                                                                                               |             |                  | <b>2.33</b> | <b>1.10-4.95</b> | <b>2.58</b> | <b>1.27-5.26</b> | <b>2.52</b> | <b>1.20-5.32</b> | <b>2.49</b> | <b>1.22-5.09</b> | <b>2.77</b> | <b>1.35-5.70</b> |
| Proportion of male residents below median (40%)                                                                                                                                                   |             |                  |             |                  |             |                  | 1.07        | 0.55-2.08        |             |                  |             |                  |
| Proportion of Black residents below median (28%)                                                                                                                                                  |             |                  |             |                  |             |                  |             |                  | 1.55        | 0.76-3.15        |             |                  |
| CMS star rating: quality = 5 Stars                                                                                                                                                                |             |                  |             |                  |             |                  |             |                  |             |                  | 1.68        | 0.84-3.35        |
| <b>Bold</b> if significant at p < 0.05; <b>Abbreviations:</b> OR= odds ratio, CI=confidence interval, NH=nursing home, HPRD=hours per resident day, CMS=Center for Medicare and Medicaid Services |             |                  |             |                  |             |                  |             |                  |             |                  |             |                  |

246

247 **References**

- 248 1. Centers for Disease Control and Prevention. Interim Infection Prevention and Control  
249 Recommendations for Healthcare Personnel During the Coronavirus Disease 2019 (COVID-  
250 19) Pandemic. Published February 23, 2021. [https://www.cdc.gov/coronavirus/2019-](https://www.cdc.gov/coronavirus/2019-ncov/hcp/infection-control-recommendations.html)  
251 [ncov/hcp/infection-control-recommendations.html](https://www.cdc.gov/coronavirus/2019-ncov/hcp/infection-control-recommendations.html)
- 252 2. Chidambaram P, Garfield R, Neuman T, Levitt L. Is the End of the Long-Term Care Crisis  
253 Within Sight? New COVID-19 Cases and Deaths in Long-Term Care Facilities Are  
254 Dropping. KFF. Published February 24, 2021. [https://www.kff.org/policy-watch/is-the-end-of-](https://www.kff.org/policy-watch/is-the-end-of-the-long-term-care-crisis-within-sight-new-covid-19-cases-and-deaths-in-long-term-care-facilities-are-dropping/)  
255 [the-long-term-care-crisis-within-sight-new-covid-19-cases-and-deaths-in-long-term-care-](https://www.kff.org/policy-watch/is-the-end-of-the-long-term-care-crisis-within-sight-new-covid-19-cases-and-deaths-in-long-term-care-facilities-are-dropping/)  
256 [facilities-are-dropping/](https://www.kff.org/policy-watch/is-the-end-of-the-long-term-care-crisis-within-sight-new-covid-19-cases-and-deaths-in-long-term-care-facilities-are-dropping/)
- 257 3. Sun CLF, Zuccarelli E, Zerhouni EGA, et al. Predicting Coronavirus Disease 2019 Infection  
258 Risk and Related Risk Drivers in Nursing Homes: A Machine Learning Approach. *J Am Med*  
259 *Dir Assoc.* 2020;21(11):1533-1538.e6.
- 260 4. Unruh MA, Yun H, Zhang Y, Braun RT, Jung H-Y. Nursing Home Characteristics Associated  
261 With COVID-19 Deaths in Connecticut, New Jersey, and New York. *J Am Med Dir Assoc.*  
262 2020;21(7):1001-1003.
- 263 5. Abrams HR, Loomer L, Gandhi A, Grabowski DC. Characteristics of U.S. Nursing Homes  
264 with COVID-19 Cases. *J Am Geriatr Soc.* 2020;68(8):1653-1656.
- 265 6. Brown KA, Jones A, Daneman N, et al. Association Between Nursing Home Crowding and  
266 COVID-19 Infection and Mortality in Ontario, Canada. *JAMA Intern Med.* Published online  
267 November 9, 2020.
- 268 7. Chatterjee P, Kelly S, Qi M, Werner RM. Characteristics and Quality of US Nursing Homes  
269 Reporting Cases of Coronavirus Disease 2019 (COVID-19). *JAMA Netw Open.*  
270 2020;3(7):e2016930.

- 271 8. Bui DP, See I, Hesse EM, et al. Association Between CMS Quality Ratings and COVID-19  
272 Outbreaks in Nursing Homes - West Virginia, March 17-June 11, 2020. *MMWR Morb Mortal*  
273 *Wkly Rep.* 2020;69(37):1300-1304.
- 274 9. Li Y, Temkin-Greener H, Shan G, Cai X. COVID-19 Infections and Deaths among  
275 Connecticut Nursing Home Residents: Facility Correlates. *J Am Geriatr Soc.* Published  
276 online June 18, 2020.
- 277 10. He M, Li Y, Fang F. Is There a Link between Nursing Home Reported Quality and COVID-  
278 19 Cases? Evidence from California Skilled Nursing Facilities. *J Am Med Dir Assoc.*  
279 2020;21(7):905-908.
- 280 11. Figueroa JF, Wadhera RK, Papanicolas I, et al. Association of Nursing Home Ratings on  
281 Health Inspections, Quality of Care, and Nurse Staffing With COVID-19 Cases. *JAMA.*  
282 2020;324(11):1103-1105.
- 283 12. Harrington C, Ross L, Chapman S, Halifax E, Spurlock B, Bakerjian D. Nurse Staffing and  
284 Coronavirus Infections in California Nursing Homes. *Policy Polit Nurs Pract.* 2020;21(3):174-  
285 186.
- 286 13. Maryland Department of Health and Mental Hygiene. Maryland COVID-19 in Congregate  
287 Facility Settings. <https://coronavirus.maryland.gov/pages/hcf-resources>
- 288 14. Johns Hopkins Coronavirus Resource Center. COVID-19 United States Cases by County.  
289 <https://coronavirus.jhu.edu/>
- 290 15. Center for Medicare & Medicaid Services. Staffing Data Submission Payroll Based Journal  
291 (PBJ). Published 2020. [https://www.cms.gov/Medicare/Quality-Initiatives-Patient-](https://www.cms.gov/Medicare/Quality-Initiatives-Patient-Assessment-Instruments/NursingHomeQualityInits/Staffing-Data-Submission-PBJ)  
292 [Assessment-Instruments/NursingHomeQualityInits/Staffing-Data-Submission-PBJ](https://www.cms.gov/Medicare/Quality-Initiatives-Patient-Assessment-Instruments/NursingHomeQualityInits/Staffing-Data-Submission-PBJ)
- 293 16. National Quality Forum. *Patient Safety: Final Technical Report.*; 2016.  
294 [https://www.qualityforum.org/Publications/2016/02/Patient\\_Safety\\_2015\\_Final\\_Report.aspx](https://www.qualityforum.org/Publications/2016/02/Patient_Safety_2015_Final_Report.aspx)
- 295 17. Zhang Z. Model building strategy for logistic regression: purposeful selection. *Ann Transl*  
296 *Med.* 2016;4(6):111.



- 297 18. Hosmer DW, Lemeshow S, Sturdivant RX. *Applied Logistic Regression*. Vol 398. John Wiley  
298 & Sons; 2013.
- 299 19. Chen MK, Chevalier JA, Long EF. Nursing home staff networks and COVID-19. *Proc Natl*  
300 *Acad Sci*. 2021;118(1).
- 301 20. Bagchi S, Mak J, Li Q, et al. Rates of COVID-19 Among Residents and Staff Members in  
302 Nursing Homes - United States, May 25-November 22, 2020. *MMWR Morb Mortal Wkly*  
303 *Rep*. 2021;70(2):52-55.
- 304
